# Supplementary material for: Assessment of Surface Water Quality in the Podu Iloaiei Dam Lake (North-Eastern Romania): Potential Implications for Aquaculture Activities in the Area
Source: MDPI journal article supplement (doi:10.3390/w13172395), 2021-08-31

## Supplementary material for

Assessment of surface water quality in the Podu Iloaiei Dam Lake (north-eastern Romania): Potential implications for aquaculture activities in the area

Cornelia Amarandei <sup>1,2</sup>, Alina-Giorgiana Negru <sup>2</sup>, Laurentiu-Valentin Soroaga <sup>1,2</sup>, Simona-Maria Cucu-Man <sup>1</sup>, Romeo-Iulian Olariu <sup>1,2</sup>, and Cecilia Arsene <sup>1,2,\*</sup>

<sup>1</sup>“Alexandru Ioan Cuza” University of Iasi, Faculty of Chemistry, Department of Chemistry, 11 Carol I, 700506 Iasi, Romania

<sup>2</sup>“Alexandru Ioan Cuza” University of Iasi, Integrated Centre of Environmental Science Studies in the North Eastern Region, 11 Carol I, 700506 Iasi, Romania

\*Correspondence to: carsene@uaic.ro; Phone number: +40-232-201354; Fax: +40-232-201313; Postal address: Cecilia Arsene, “Alexandru Ioan Cuza” University of Iasi, Faculty of Chemistry, Department of Chemistry, 11 Carol I, 700506 Iasi, Romania

**Table S1.** Classification of waters in the quality classes in order to establish the ecological status of water bodies (extracted from Order no. 161/2006).

### Chemical and physico-chemical elements and quality standards in water

| No.                                         | Indicator of quality                                       | U/M    | Class of quality       |      |      |      |        |
|---------------------------------------------|------------------------------------------------------------|--------|------------------------|------|------|------|--------|
|                                             |                                                            |        | I                      | II   | III  | IV   | V      |
| Thermal regime and acidification            |                                                            |        |                        |      |      |      |        |
| 1                                           | Temperature                                                | °C     | It is not standardized |      |      |      |        |
| 2                                           | pH                                                         |        | 6.5 – 8.5              |      |      |      |        |
| Nutrients                                   |                                                            |        |                        |      |      |      |        |
| 1                                           | Ammonium (N-NH <sub>4</sub> <sup>+</sup> )                 | mg N/L | 0.4                    | 0.8  | 1.2  | 3.2  | > 3.2  |
| 2                                           | Nitrite (N-NO <sub>2</sub> <sup>-</sup> )                  | mg N/L | 0.01                   | 0.03 | 0.06 | 0.3  | > 0.3  |
| 3                                           | Nitrate (N-NO <sub>3</sub> <sup>-</sup> )                  | mg N/L | 1                      | 3    | 5.6  | 11.2 | > 11.2 |
| 4                                           | Soluble orthophosphates (P-PO <sub>4</sub> <sup>3-</sup> ) | mg P/L | 0.1                    | 0.2  | 0.4  | 0.9  | > 0.9  |
| Salinity                                    |                                                            |        |                        |      |      |      |        |
| 1                                           | Conductivity                                               | μS/cm  |                        |      |      |      |        |
| 2                                           | Chlorides (Cl <sup>-</sup> )                               | mg/L   | 25                     | 50   | 250  | 300  | > 300  |
| 3                                           | Sulphates (SO <sub>4</sub> <sup>2-</sup> )                 | mg/L   | 60                     | 120  | 250  | 300  | > 300  |
| 4                                           | Calcium (Ca <sup>2+</sup> )                                | mg/L   | 50                     | 100  | 200  | 300  | > 300  |
| 5                                           | Magnesium (Mg <sup>2+</sup> )                              | mg/L   | 12                     | 50   | 100  | 200  | > 200  |
| 6                                           | Sodium (Na <sup>+</sup> )                                  | mg/L   | 12                     | 50   | 100  | 200  | > 200  |
| Specific toxic pollutants of natural origin |                                                            |        |                        |      |      |      |        |
| 1                                           | Total Chromium (Cr <sup>3+</sup> + Cr <sup>6+</sup> )      | μg/L   | 25                     | 50   | 100  | 250  | > 250  |
| 2                                           | Zinc (Zn <sup>2+</sup> )                                   | μg/L   | 100                    | 200  | 500  | 1000 | > 1000 |
| 3                                           | Barium (Ba <sup>2+</sup> )                                 | mg/L   | 0.05                   | 0.1  | 0.5  | 1    | > 1    |
| 4                                           | Lead (Pb)                                                  | μg/L   | 5                      | 10   | 25   | 50   | > 50   |
| 5                                           | Cadmium (Cd)                                               | μg/L   | 0.5                    | 1    | 2    | 5    | > 5    |
| 6                                           | Total Manganese (Mn <sup>2+</sup> + Mn <sup>7+</sup> )     | mg/L   | 0.05                   | 0.1  | 0.3  | 1    | > 1    |
| 7                                           | Nickel (Ni)                                                | μg/L   | 10                     | 25   | 50   | 100  | > 100  |

For the limits of detection (LoD) and limits of quantification (LoQ) estimation, the standard deviation 3 times and 10 times, respectively, of ten measurements corresponding to the standard with the lowest concentration have been used to perform the calibration curves, relative to the method sensitivity for each ionic species.

**Table S2.** Limits of detection (LoD) and limits of quantification (LoQ) for ion chromatography determined water-soluble ions in the water and sediment samples.

| Anions                                                    | LoD ( $\mu\text{g L}^{-1}$ ) | LoQ ( $\mu\text{g L}^{-1}$ ) |
|-----------------------------------------------------------|------------------------------|------------------------------|
| F <sup>-</sup>                                            | 7.3                          | 24.3                         |
| Cl <sup>-</sup>                                           | 31.0                         | 103                          |
| NO <sub>2</sub> <sup>-</sup>                              | 20.0                         | 66.6                         |
| Br <sup>-</sup>                                           | 14.7                         | 48.9                         |
| NO <sub>3</sub> <sup>-</sup>                              | 21.2                         | 70.6                         |
| PO <sub>4</sub> <sup>3-</sup>                             | 17.8                         | 59.3                         |
| SO <sub>4</sub> <sup>2-</sup>                             | 23.7                         | 78.9                         |
| H <sub>3</sub> C <sub>2</sub> O <sub>2</sub> <sup>-</sup> | 106                          | 356                          |
| HCO <sub>2</sub> <sup>-</sup>                             | 39.2                         | 130                          |
| C <sub>2</sub> O <sub>4</sub> <sup>2-</sup>               | 56.3                         | 188                          |

| Cations                      | LoD ( $\mu\text{g L}^{-1}$ ) | LoQ ( $\mu\text{g L}^{-1}$ ) |
|------------------------------|------------------------------|------------------------------|
| Li <sup>+</sup>              | 0.4                          | 1.5                          |
| Na <sup>+</sup>              | 13.6                         | 45.4                         |
| NH <sub>4</sub> <sup>+</sup> | 15.7                         | 52.5                         |
| K <sup>+</sup>               | 44.4                         | 148                          |
| Mg <sup>2+</sup>             | 18.7                         | 62.4                         |
| Ca <sup>2+</sup>             | 48.5                         | 161                          |

**Table S3.** Limits of detection (LoD) and limits of quantification (LoQ) for inductively coupled plasma mass spectrometry determined elements in the water and sediment samples.

| Element          | LoD ( $\mu\text{g L}^{-1}$ ) | LoQ ( $\mu\text{g L}^{-1}$ ) |
|------------------|------------------------------|------------------------------|
| <sup>9</sup> Be  | 1.86                         | 6.20                         |
| <sup>11</sup> B  | 71.7                         | 239                          |
| <sup>24</sup> Mg | 0.72                         | 2.41                         |
| <sup>27</sup> Al | 0.38                         | 1.26                         |
| <sup>47</sup> Ti | 1.93                         | 6.45                         |
| <sup>51</sup> V  | 0.41                         | 1.36                         |
| <sup>52</sup> Cr | 0.42                         | 1.41                         |
| <sup>55</sup> Mn | 0.53                         | 1.75                         |
| <sup>56</sup> Fe | 9.14                         | 30.48                        |
| <sup>59</sup> Co | 0.19                         | 0.62                         |
| <sup>60</sup> Ni | 1.70                         | 5.65                         |
| <sup>63</sup> Cu | 18.6                         | 62.1                         |
| <sup>66</sup> Zn | 0.94                         | 3.14                         |
| <sup>69</sup> Ga | 0.15                         | 0.49                         |
| <sup>72</sup> Ge | 0.87                         | 2.92                         |
| <sup>75</sup> As | 2.42                         | 8.06                         |
| <sup>78</sup> Se | 3.81                         | 12.71                        |

| Element           | LoD ( $\mu\text{g L}^{-1}$ ) | LoQ ( $\mu\text{g L}^{-1}$ ) |
|-------------------|------------------------------|------------------------------|
| <sup>85</sup> Rb  | 0.62                         | 2.07                         |
| <sup>88</sup> Sr  | 0.02                         | 0.05                         |
| <sup>95</sup> Mo  | 1.87                         | 6.23                         |
| <sup>101</sup> Ru | 0.10                         | 0.34                         |
| <sup>105</sup> Pd | 0.08                         | 0.26                         |
| <sup>107</sup> Ag | 0.04                         | 0.12                         |
| <sup>112</sup> Cd | 0.05                         | 0.16                         |
| <sup>114</sup> Cd | 0.03                         | 0.11                         |
| <sup>118</sup> Sn | 0.17                         | 0.57                         |
| <sup>121</sup> Sb | 0.14                         | 0.47                         |
| <sup>125</sup> Te | 0.33                         | 1.10                         |
| <sup>135</sup> Ba | 0.14                         | 0.47                         |
| <sup>193</sup> Ir | 0.08                         | 0.27                         |
| <sup>205</sup> Tl | 0.03                         | 0.09                         |
| <sup>208</sup> Pb | 0.15                         | 0.51                         |
| <sup>209</sup> Bi | 0.10                         | 0.33                         |
| <sup>238</sup> U  | 0.005                        | 0.016                        |

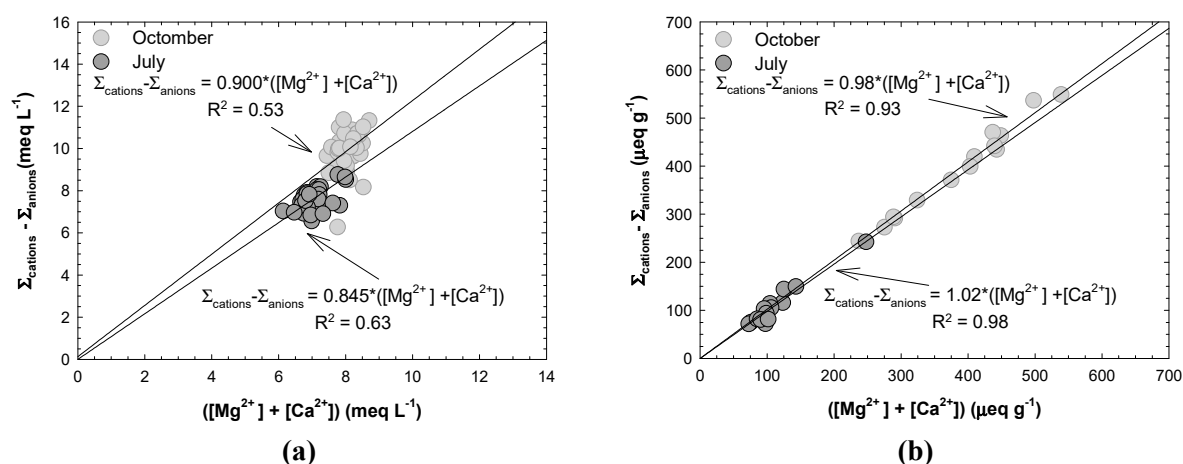

**Figure S1.** Linear regression between ( $\Sigma_{\text{cations}} - \Sigma_{\text{identified anions}}$ ) and ( $[\text{Mg}^{2+}] + [\text{Ca}^{2+}]$ ) for water (a) and

sediment **(b)** samples in both sampling sessions.

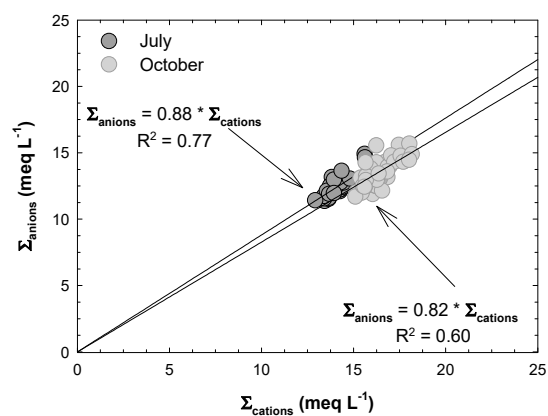

**(a)**

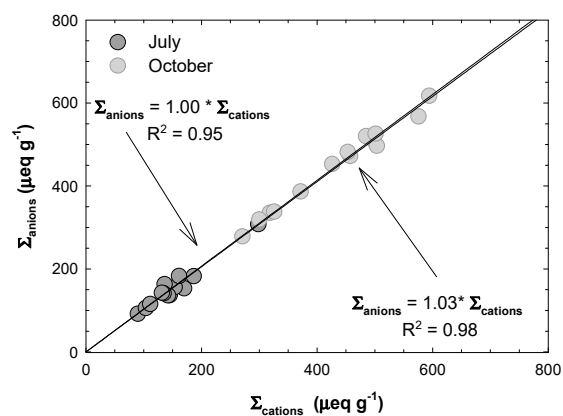

**(b)**

**Figure S2.** Linear regression for the ionic balance evaluation of water **(a)** and sediment **(b)** samples (including the  $\text{HCO}_3^-$  estimation).

**Table S4.** Pearson's correlation coefficient of chemical species, pH and conductivity (S) determined in water samples collected from Podu Iloaiei Dam Lake.

|                               | Al | Cr   | Mn   | Ni    | Zn    | Ge    | Sr    | Ag    | Sb    | Ba    | Pb    | Cl <sup>-</sup> | SO <sub>4</sub> <sup>2-</sup> | Na <sup>+</sup> | NH <sub>4</sub> <sup>+</sup> | K <sup>+</sup> | Mg <sup>2+</sup> | Ca <sup>2+</sup> | pH    | S     |
|-------------------------------|----|------|------|-------|-------|-------|-------|-------|-------|-------|-------|-----------------|-------------------------------|-----------------|------------------------------|----------------|------------------|------------------|-------|-------|
| Al                            | 1  | 0.10 | 0.12 | -0.21 | 0.32  | 0.60  | -0.15 | -0.20 | -0.15 | 0.13  | 0.39  | -0.04           | -0.09                         | 0.06            | -0.04                        | -0.14          | 0.03             | 0.03             | -0.08 | 0.07  |
| Cr                            |    | 1    | 0.38 | -0.28 | 0.33  | -0.59 | -0.26 | -0.23 | 0.65  | 0.72  | -0.25 | 0.23            | -0.63                         | 0.49            | 0.51                         | 0.10           | 0.56             | 0.35             | -0.56 | 0.55  |
| Mn                            |    |      | 1    | -0.25 | 0.48  | 0.22  | 0.02  | 0.57  | 0.30  | 0.37  | 0.13  | 0.49            | -0.44                         | 0.44            | 0.68                         | 0.39           | -0.04            | 0.50             | -0.46 | 0.40  |
| Ni                            |    |      |      | 1     | -0.05 | 0.68  | 0.00  | 0.11  | 0.32  | 0.01  | -0.16 | 0.04            | -0.23                         | 0.20            | 0.07                         | -0.07          | 0.13             | 0.02             | -0.21 | 0.18  |
| Zn                            |    |      |      |       | 1     | -0.05 | -0.06 | -0.05 | 0.93  | -0.04 | -0.04 | 0.00            | -0.20                         | 0.06            | 0.42                         | 0.00           | -0.08            | 0.14             | -0.21 | 0.18  |
| Ge                            |    |      |      |       |       | 1     | 0.48  | 0.00  | -0.11 | 0.54  | -0.21 | 0.39            | 0.21                          | 0.36            | 0.07                         | -0.01          | 0.39             | 0.45             | -0.19 | 0.15  |
| Sr                            |    |      |      |       |       |       | 1     | 0.05  | -0.02 | 0.08  | -0.14 | 0.57            | 0.38                          | 0.44            | 0.00                         | 0.07           | 0.65             | 0.80             | -0.09 | 0.09  |
| Ag                            |    |      |      |       |       |       |       | 1     | 0.49  | 0.30  | 0.24  | 0.13            | -0.27                         | 0.26            | 0.23                         | 0.07           | 0.24             | 0.11             | -0.30 | 0.29  |
| Sb                            |    |      |      |       |       |       |       |       | 1     | 0.16  | 0.22  | -0.01           | -0.40                         | 0.24            | 0.63                         | 0.50           | 0.18             | 0.05             | -0.41 | 0.38  |
| Ba                            |    |      |      |       |       |       |       |       |       | 1     | 0.15  | 0.45            | -0.34                         | 0.43            | 0.33                         | 0.41           | 0.30             | 0.15             | -0.41 | 0.43  |
| Pb                            |    |      |      |       |       |       |       |       |       |       | 1     | 0.03            | -0.01                         | 0.10            | 0.08                         | 0.30           | 0.07             | 0.08             | -0.02 | 0.04  |
| Cl <sup>-</sup>               |    |      |      |       |       |       |       |       |       |       |       | 1               | -0.12                         | 0.76            | 0.55                         | 0.62           | 0.63             | 0.71             | -0.49 | 0.49  |
| SO <sub>4</sub> <sup>2-</sup> |    |      |      |       |       |       |       |       |       |       |       |                 | 1                             | -0.54           | -0.59                        | -0.18          | -0.29            | 0.04             | 0.82  | -0.76 |
| Na <sup>+</sup>               |    |      |      |       |       |       |       |       |       |       |       |                 |                               | 1               | 0.65                         | 0.47           | 0.86             | 0.70             | -0.84 | 0.83  |
| NH <sub>4</sub> <sup>+</sup>  |    |      |      |       |       |       |       |       |       |       |       |                 |                               |                 | 1                            | 0.62           | 0.28             | 0.36             | -0.66 | 0.64  |
| K <sup>+</sup>                |    |      |      |       |       |       |       |       |       |       |       |                 |                               |                 |                              | 1              | 0.17             | 0.23             | -0.26 | 0.24  |
| Mg <sup>2+</sup>              |    |      |      |       |       |       |       |       |       |       |       |                 |                               |                 |                              |                | 1                | 0.74             | -0.67 | 0.68  |
| Ca <sup>2+</sup>              |    |      |      |       |       |       |       |       |       |       |       |                 |                               |                 |                              |                |                  | 1                | -0.42 | 0.43  |
| pH                            |    |      |      |       |       |       |       |       |       |       |       |                 |                               |                 |                              |                |                  |                  | 1     | -0.90 |
| S                             |    |      |      |       |       |       |       |       |       |       |       |                 |                               |                 |                              |                |                  |                  |       | 1     |

Values highlighted with light grey colour present  $0.001 < p\text{-value} < 0.05$ Values highlighted with dark grey colour present  $p\text{-value} < 0.001$ **Table S5.** Pearson's correlation coefficient of chemical species quantified in sediment samples collected from Podu Iloaiei Dam Lake.

|    | Al | Ti    | Cr    | Mn    | Ni    | Zn    | Ge    | Sr    | Ag    | Sb    | Ba    | Pb    | Cl <sup>-</sup> | SO <sub>4</sub> <sup>2-</sup> | C <sub>2</sub> O <sub>4</sub> <sup>2-</sup> | Na <sup>+</sup> | NH <sub>4</sub> <sup>+</sup> | K <sup>+</sup> | Mg <sup>2+</sup> | Ca <sup>2+</sup> |
|----|----|-------|-------|-------|-------|-------|-------|-------|-------|-------|-------|-------|-----------------|-------------------------------|---------------------------------------------|-----------------|------------------------------|----------------|------------------|------------------|
| Al | 1  | -0.30 | -0.14 | 0.38  | 0.27  | 0.30  | -0.28 | 0.27  | 0.34  | -0.21 | 0.39  | 0.77  | -0.25           | -0.13                         | 0.05                                        | 0.11            | -0.17                        | 0.18           | 0.24             | 0.29             |
| Ti |    | 1     | -0.37 | -0.30 | -0.30 | -0.33 | 0.06  | -0.20 | -0.43 | 0.60  | -0.06 | -0.20 | -0.04           | -0.20                         | -0.27                                       | -0.27           | 0.01                         | -0.23          | -0.22            | -0.27            |
| Cr |    |       | 1     | -0.27 | -0.32 | -0.25 | -0.11 | -0.19 | -0.23 | -0.37 | -0.18 | -0.12 | -0.03           | -0.01                         | 0.23                                        | -0.23           | -0.04                        | -0.27          | -0.18            | -0.16            |

|                                             |   |      |      |       |       |      |       |       |       |       |       |       |       |       |       |       |       |
|---------------------------------------------|---|------|------|-------|-------|------|-------|-------|-------|-------|-------|-------|-------|-------|-------|-------|-------|
| Mn                                          | 1 | 0.22 | 0.83 | -0.08 | 0.50  | 0.29 | 0.21  | 0.72  | -0.10 | -0.59 | -0.19 | -0.07 | 0.14  | -0.13 | 0.35  | 0.47  | 0.46  |
| Ni                                          |   | 1    | 0.09 | 0.19  | 0.26  | 0.58 | 0.10  | 0.33  | 0.11  | -0.02 | 0.17  | 0.13  | 0.35  | 0.07  | 0.33  | 0.32  | 0.30  |
| Zn                                          |   |      | 1    | -0.25 | 0.63  | 0.66 | 0.09  | 0.60  | -0.12 | -0.33 | -0.09 | -0.05 | 0.39  | 0.15  | 0.40  | 0.51  | 0.53  |
| Ge                                          |   |      |      | 1     | -0.43 | 0.25 | 0.25  | -0.18 | 0.04  | -0.02 | -0.23 | -0.43 | -0.43 | -0.12 | -0.39 | -0.40 | -0.43 |
| Sr                                          |   |      |      |       | 1     | 0.27 | 0.02  | 0.59  | -0.24 | -0.27 | 0.20  | 0.33  | 0.53  | -0.04 | 0.85  | 0.97  | 0.94  |
| Ag                                          |   |      |      |       |       | 1    | -0.33 | 0.43  | -0.06 | -0.09 | 0.45  | -0.25 | 0.29  | -0.23 | 0.51  | 0.37  | 0.24  |
| Sb                                          |   |      |      |       |       |      | 1     | -0.07 | -0.09 | 0.14  | -0.20 | 0.16  | 0.10  | 0.11  | 0.08  | 0.01  | 0.06  |
| Ba                                          |   |      |      |       |       |      |       | 1     | -0.08 | -0.68 | -0.18 | -0.10 | 0.17  | -0.06 | 0.42  | 0.55  | 0.51  |
| Pb                                          |   |      |      |       |       |      |       |       | 1     | 0.16  | -0.22 | -0.11 | -0.14 | -0.09 | -0.27 | -0.29 | -0.17 |
| Cl <sup>-</sup>                             |   |      |      |       |       |      |       |       |       | 1     | 0.40  | 0.53  | 0.42  | 0.35  | -0.01 | -0.26 | -0.22 |
| SO <sub>4</sub> <sup>2-</sup>               |   |      |      |       |       |      |       |       |       |       | 1     | 0.37  | 0.54  | 0.05  | 0.53  | 0.33  | 0.23  |
| C <sub>2</sub> O <sub>4</sub> <sup>2-</sup> |   |      |      |       |       |      |       |       |       |       |       | 1     | 0.79  | 0.64  | 0.47  | 0.39  | 0.47  |
| Na <sup>+</sup>                             |   |      |      |       |       |      |       |       |       |       |       |       | 1     | 0.52  | 0.72  | 0.55  | 0.53  |
| NH <sub>4</sub> <sup>+</sup>                |   |      |      |       |       |      |       |       |       |       |       |       |       | 1     | 0.03  | -0.09 | -0.06 |
| K <sup>+</sup>                              |   |      |      |       |       |      |       |       |       |       |       |       |       |       | 1     | 0.92  | 0.86  |
| Mg <sup>2+</sup>                            |   |      |      |       |       |      |       |       |       |       |       |       |       |       |       | 1     | 0.96  |
| Ca <sup>2+</sup>                            |   |      |      |       |       |      |       |       |       |       |       |       |       |       |       |       | 1     |

Values highlighted with light grey colour present  $0.001 < p\text{-value} < 0.05$

Values highlighted with dark grey colour present  $p\text{-value} < 0.001$

**Figure S3.** Spatial distribution of K<sup>+</sup>, NO<sub>2</sub><sup>-</sup>, H<sub>3</sub>C<sub>2</sub>O<sub>2</sub><sup>-</sup>, and HCO<sub>2</sub><sup>-</sup> in water and sediment of Podu Iloaiei Dam Lake.

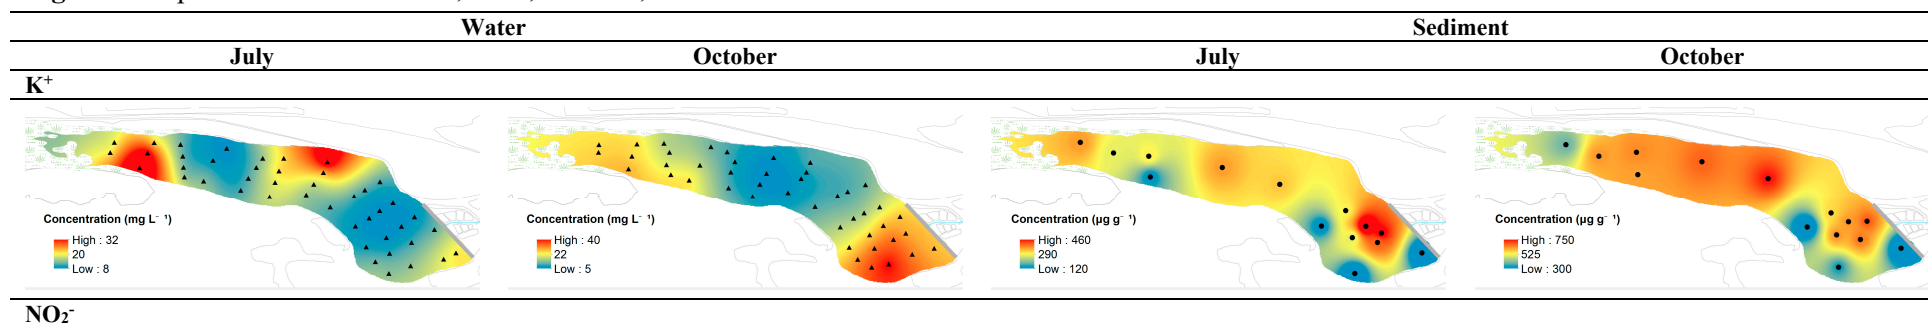

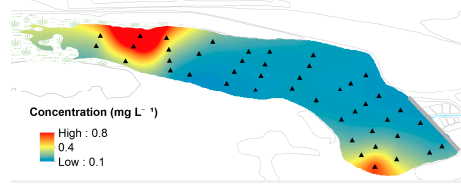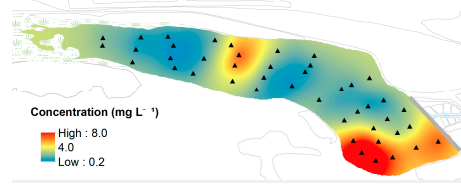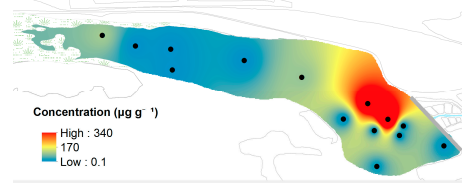

## $\text{H}_3\text{C}_2\text{O}_2^-$

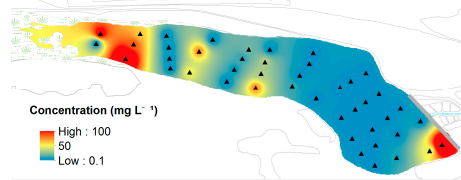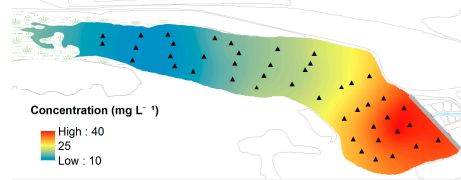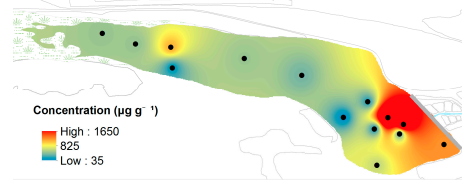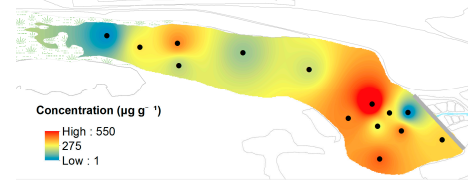

## $\text{HCO}_2^-$

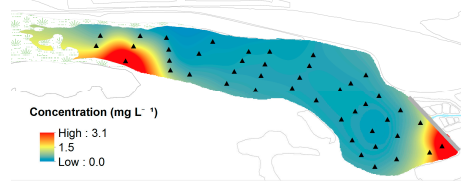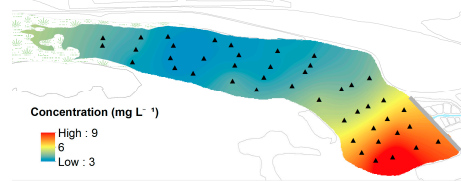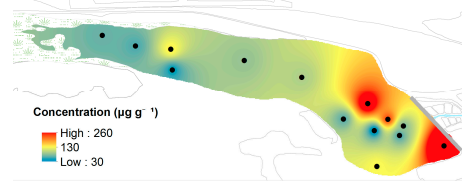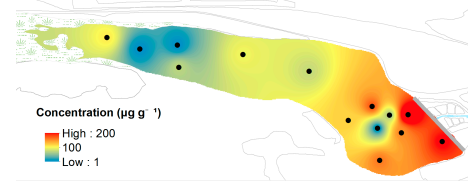

**Figure S4.** Spatial distribution of water-soluble Al, Ge, Ag, and Sb in water and sediment of Podu Iloaiei Dam Lake.

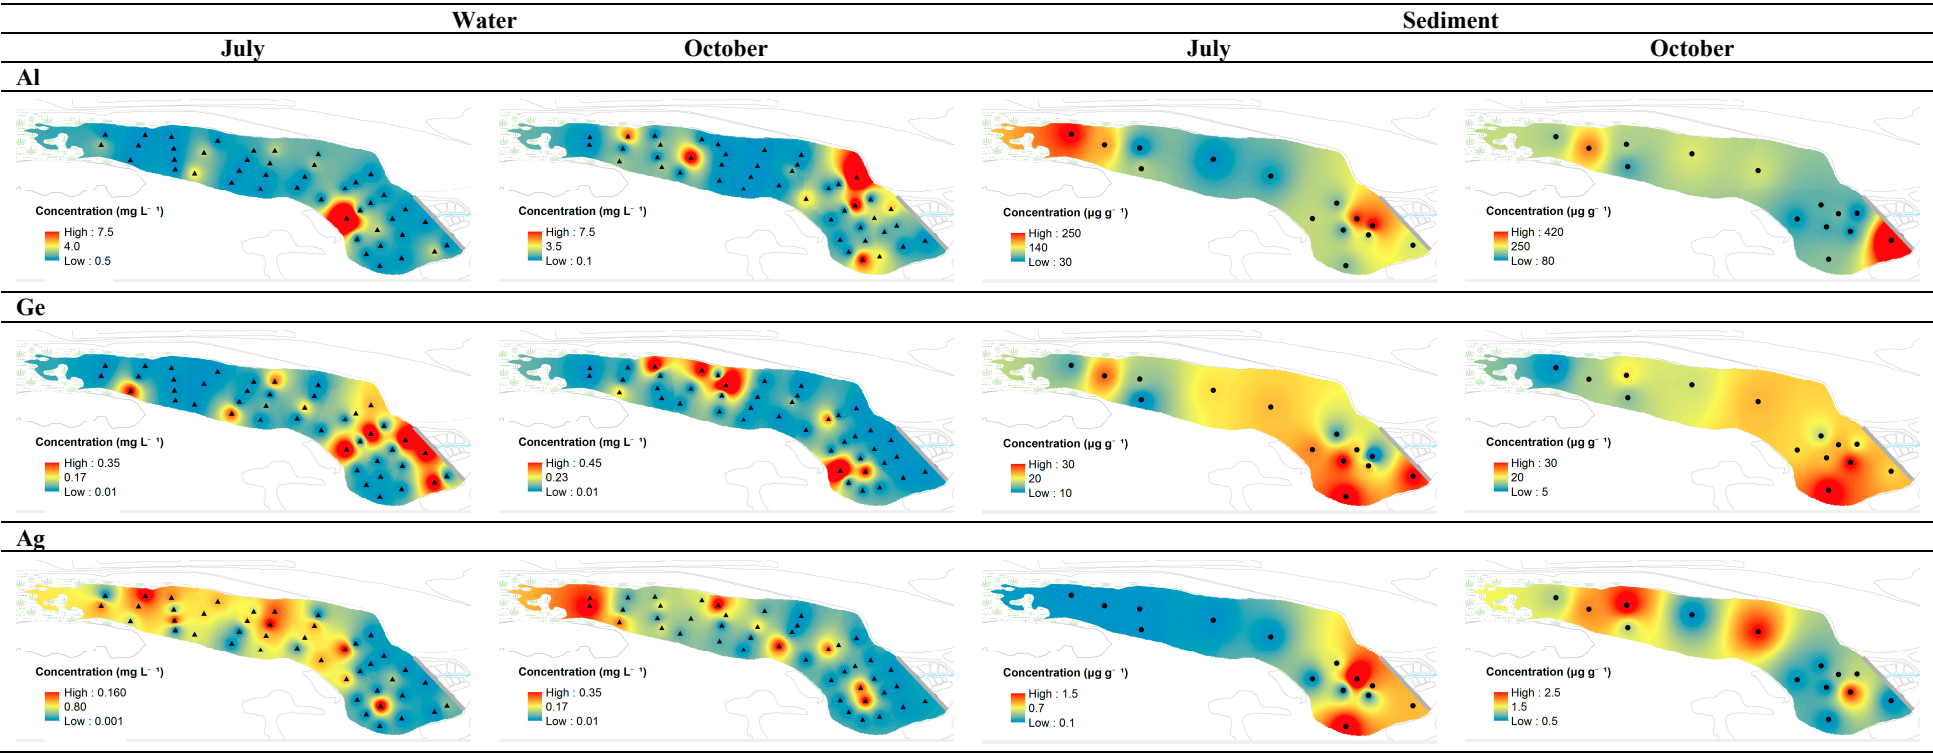

Supplement: s1 [file s1]
